# Supplementary material for: Omega-3 Long-Chain Polyunsaturated Fatty Acids Intake in Children with Attention Deficit and Hyperactivity Disorder
Source: MDPI journal article supplement (doi:10.3390/brainsci9050120), 2019-05-23
Supplement: s1 [file s1]

**Table S1: Frequency of lean fish intake**

|           |                          | GRUPO   |      |       |
|-----------|--------------------------|---------|------|-------|
|           |                          | Control | ADHD | Total |
| Lean fish | Did not eat              | 11      | 9    | 20    |
|           | Once-three times a month | 21      | 9    | 30    |
|           | Once a week              | 15      | 0    | 15    |
|           | Twice-four times a week  | 38      | 18   | 56    |
|           | five-six times a week    | 2       | 12   | 14    |
| Total     |                          | 87      | 48   | 135   |

**Table S2: Frequencies of fatty fish intake**

|            |                          | GRUPO   |      |       |
|------------|--------------------------|---------|------|-------|
|            |                          | Control | ADHD | Total |
| Fatty fish | Did not eat              | 9       | 18   | 27    |
|            | Once-three times a month | 9       | 17   | 26    |
|            | Once a week              | 11      | 0    | 11    |
|            | Twice-four times a week  | 31      | 1    | 32    |
|            | Five-six times a week    | 17      | 12   | 29    |
|            | Once a day               | 8       | 0    | 8     |
|            | Twice-three time a day   | 2       | 0    | 2     |
| Total      |                          | 87      | 48   | 135   |
